# Supplementary material for: Prediction of Mortality Using On-Line, Self-Reported Health Data: Empirical Test of the Realage Score
Source: PLOS journal article supplement (doi:10.1371/journal.pone.0086385), 2014-01-17
Supplement: S1 (10.1371/journal.pone.0086385.s001) [file journal.pone.0086385.s001]

# Appendix S1

## List of Figures

|     |                                                                                                                                             |    |
|-----|---------------------------------------------------------------------------------------------------------------------------------------------|----|
| S1  | <i>Comparison of death rates in RealAge sample to US death rates.</i>                                                                       | 1  |
| S2  | <i>RealAge delta in California sample with full identifiers</i>                                                                             | 2  |
| S3  | <i>RealAge delta in RealAge population</i>                                                                                                  | 3  |
| S4  | <i>RealAge delta in California sample with full identifiers - age 25 to 44</i>                                                              | 5  |
| S5  | <i>RealAge delta in California sample with full identifiers - age 45 to 64</i>                                                              | 7  |
| S6  | <i>RealAge delta in California sample with full identifiers - age 65 to 84</i>                                                              | 9  |
| S7  | <i>Calibration plot - Age.</i>                                                                                                              | 12 |
| S8  | <i>Calibration plot - RealAge.</i>                                                                                                          | 13 |
| S9  | <i>Calibration plot - Framingham.</i>                                                                                                       | 14 |
| S10 | <i>Calibration plot - Framingham (unscaled age)</i>                                                                                         | 15 |
| S11 | <i>Calibration plot - Framingham (unscaled age, indicators only)</i>                                                                        | 16 |
| S12 | <i>Comparison of RealAge score distributions for all deceased/surviving users and deceased/surviving "healthy" users (heart disease).</i>   | 21 |
| S13 | <i>Comparison of RealAge score distributions for all deceased/surviving users and deceased/surviving "healthy" users (cancer).</i>          | 23 |
| S14 | <i>Comparison of RealAge score distributions for all deceased/surviving users and deceased/surviving "healthy" users (external causes).</i> | 25 |

## List of Tables

|     |                                                                                                              |    |
|-----|--------------------------------------------------------------------------------------------------------------|----|
| S1  | 25 to 44 - causes of death                                                                                   | 4  |
| S2  | 45 to 64 - causes of death                                                                                   | 6  |
| S3  | 65 to 84 - causes of death                                                                                   | 8  |
| S4  | Log-Likelihood for Table 4 Comparison of Age and RealAge                                                     | 10 |
| S5  | Framingham Hard Coronary Heart Disease 10-Year Risk Model results—unscaled age                               | 11 |
| S6  | Framingham Hard Coronary Heart Disease 10-Year Risk Model results—indicators only, unscaled age              | 11 |
| S7  | 25 to 44 - model results                                                                                     | 17 |
| S8  | 25 to 44 - model results (age base)                                                                          | 17 |
| S9  | 45 to 64 - model results                                                                                     | 18 |
| S10 | 45 to 64 - model results (age base)                                                                          | 18 |
| S11 | 65 to 84 - model results                                                                                     | 19 |
| S12 | 65 to 84 - model results (age base)                                                                          | 19 |
| S13 | All users - Death from Heart Disease                                                                         | 20 |
| S14 | Death from Heart Disease (age in base hazard)                                                                | 20 |
| S15 | All users - Death from Cancer                                                                                | 22 |
| S16 | Death from Cancer (age in base hazard)                                                                       | 22 |
| S17 | All users - Death from External Cause                                                                        | 24 |
| S18 | Death from External Cause (age in base hazard)                                                               | 24 |
| S19 | All users - at least two years follow-up                                                                     | 26 |
| S20 | All users - Death from Heart Disease, no Report Diagnosis or Interest for Heart Attack or Stroke, no Smoking | 27 |
| S21 | All users - Death from Cancer, no Reported Diagnosis or Interest for Cancer, no Smoking                      | 27 |
| S22 | All users - Death from External Cause, no Reported Diagnosis or Interest for Depression                      | 28 |

## Comparison to US Death Rates

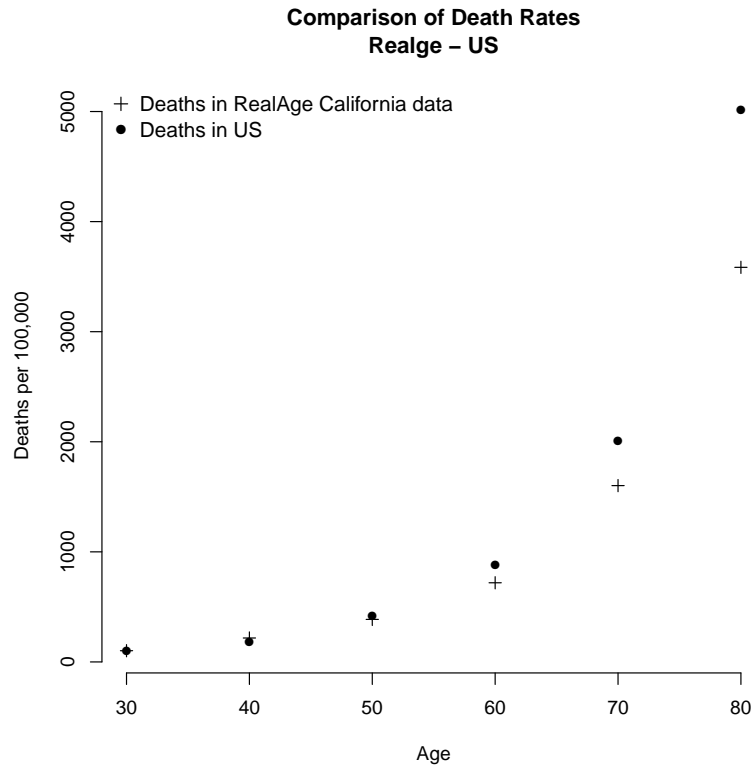

Figure S1: Comparison of death rates in RealAge sample to US death rates.

**Distribution of RealAge delta**

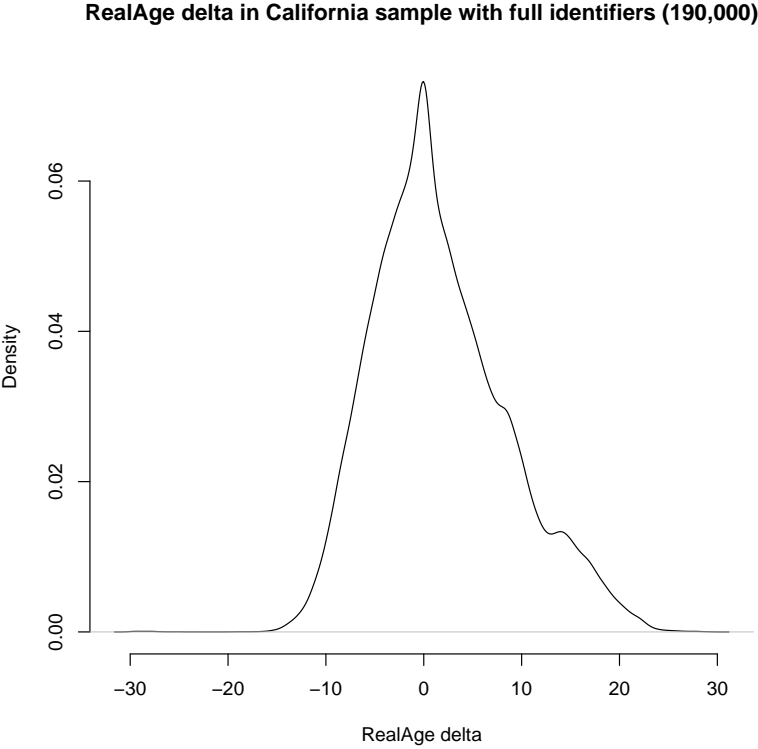

Figure S2: *RealAge delta in California sample with full identifiers*

**RealAge delta in RealAge population (10 million only)**

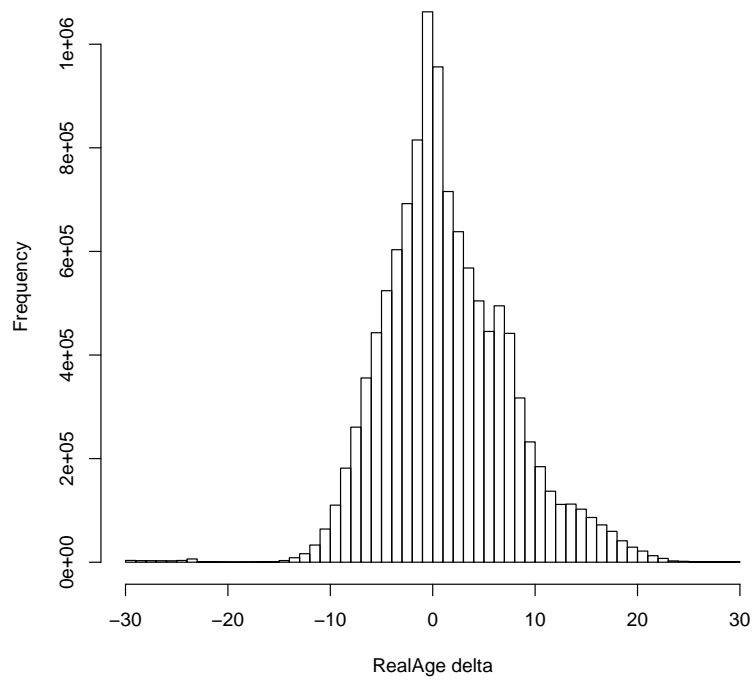

Figure S3: *RealAge delta in RealAge population*

## Causes of death and RealAge delta by age group

25 to 44

Table S1: 25 to 44 - causes of death

| Cause of Death       | Count  | Follow-Up Mean | Follow-Up Median |
|----------------------|--------|----------------|------------------|
| External Causes      | 46     | 938.5          | 767              |
| Cancer               | 21     | 1074           | 948              |
| Heart Disease        | 16     | 1307.4         | 1041             |
| # of users in sample | 74,965 |                |                  |
| # deceased in sample | 118    |                |                  |

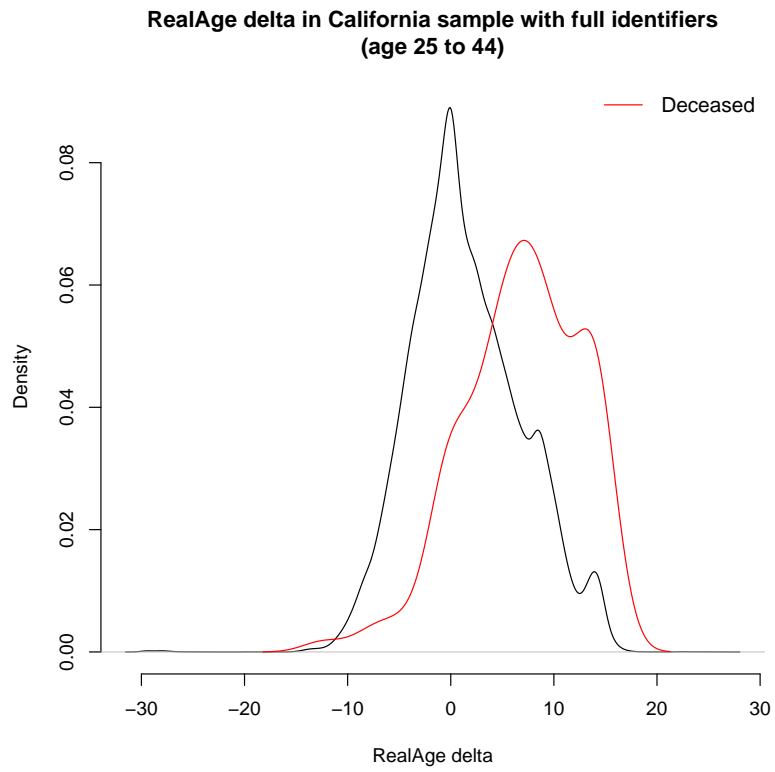

Figure S4: *RealAge delta in California sample with full identifiers - age 25 to 44*

**45 to 64**

Table S2: 45 to 64 - causes of death

| Cause of Death            | Count  | Follow-Up Mean | Follow-Up Median |
|---------------------------|--------|----------------|------------------|
| Cancer                    | 161    | 1215.3         | 980              |
| Heart Disease             | 115    | 970.4          | 779              |
| External Causes           | 48     | 935.5          | 739              |
| Chronic Lower Respiratory | 29     | 993.2          | 887              |
| # of users in sample      | 91,886 |                |                  |
| # deceased in sample      | 479    |                |                  |

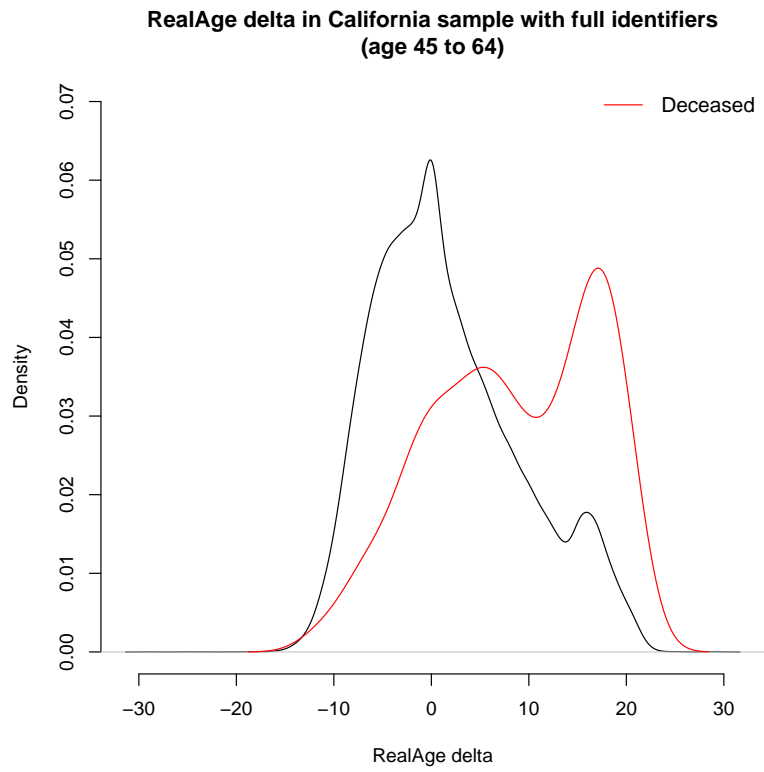

Figure S5: *RealAge delta in California sample with full identifiers - age 45 to 64*



65 to 84

Table S3: 65 to 84 - causes of death

| Cause of Death            | Count  | Follow-Up Mean | Follow-Up Median |
|---------------------------|--------|----------------|------------------|
| Cancer                    | 157    | 1016.8         | 867              |
| Heart Disease             | 121    | 1034           | 897              |
| Chronic Lower Respiratory | 29     | 1018.4         | 879              |
| Cerebrovascular Disease   | 26     | 1120           | 1028.5           |
| # of users in sample      | 21,847 |                |                  |
| # deceased in sample      | 449    |                |                  |

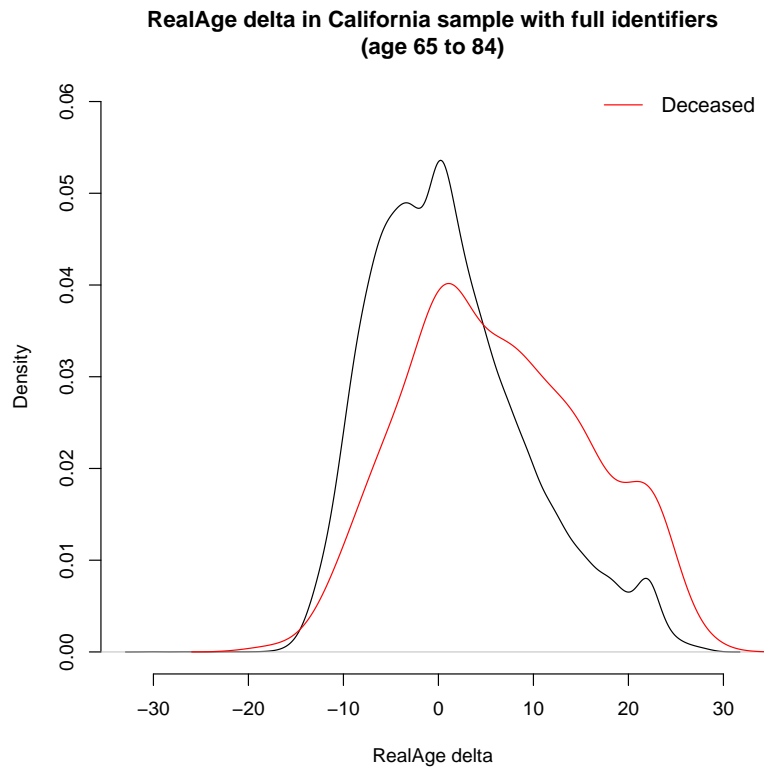

Figure S6: *RealAge delta in California sample with full identifiers - age 65 to 84*

## Log-Likelihood for Table 4 Comparison of Age and RealAge

| Table S4: Log-Likelihood for Table 4 Comparison of Age and RealAge |                          |                   |
|--------------------------------------------------------------------|--------------------------|-------------------|
| Model.1                                                            | Log.Likelihood           |                   |
| Age                                                                | -11176.1798, -10698.1112 |                   |
| Model.2                                                            | Log.Likelihood           | chisq.df.p.value  |
| RealAge                                                            | -10698.1112 -10416.2891  | 563.6442, 0, 0    |
| Model.3                                                            | Log.Likelihood           | chisq.df.p.value  |
| Age.and.RealAge.Delta                                              | -10416.2891 -10414.563   | 3.4523, 1, 0.0632 |

## Framingham Risk Factor Estimates

Table S5: Framingham Hard Coronary Heart Disease 10-Year Risk Model results—unscaled age

|                          | HR    | (2.5%, 97.5%)  | p     |
|--------------------------|-------|----------------|-------|
| Age                      | 1.073 | (1.054, 1.092) | 0.000 |
| Current Smoker           | 4.218 | (2.858, 6.221) | 0.000 |
| Blood Pressure (points)  | 1.266 | (1.062, 1.510) | 0.008 |
| Cholesterol (points)     | 0.903 | (0.789, 1.033) | 0.136 |
| HDL Cholesterol (points) | 1.202 | (0.961, 1.504) | 0.108 |

Table S6: Framingham Hard Coronary Heart Disease 10-Year Risk Model results—indicators only, unscaled age

|                | HR    | (2.5%, 97.5%)  | p     |
|----------------|-------|----------------|-------|
| Age            | 1.081 | (1.064, 1.097) | 0.000 |
| Current Smoker | 4.263 | (2.889, 6.290) | 0.000 |
| Blood Pressure | 1.567 | (1.085, 2.264) | 0.017 |
| Cholesterol    | 0.732 | (0.494, 1.085) | 0.121 |

## Calibration plots

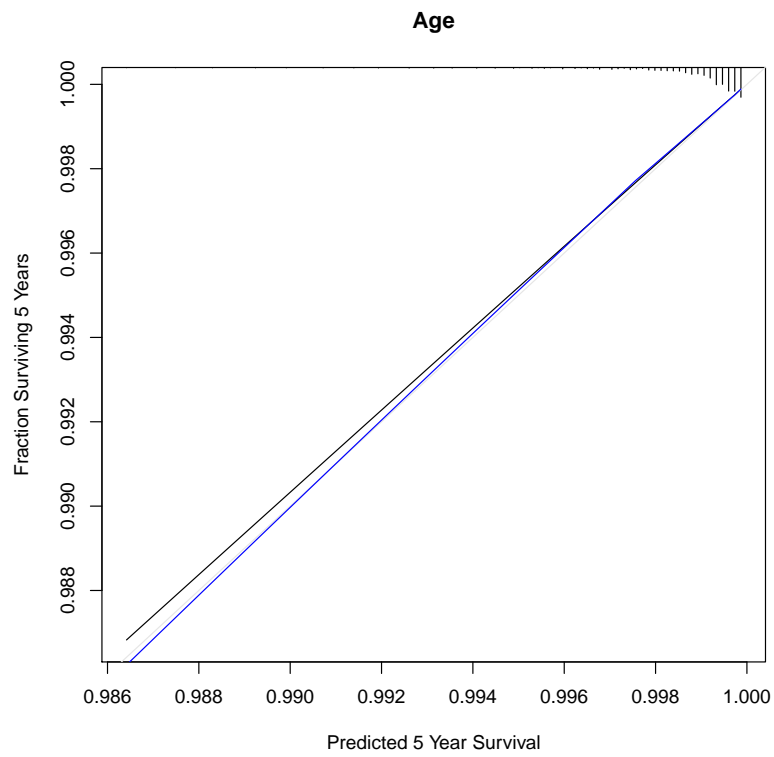

Figure S7: Calibration plot - Age.

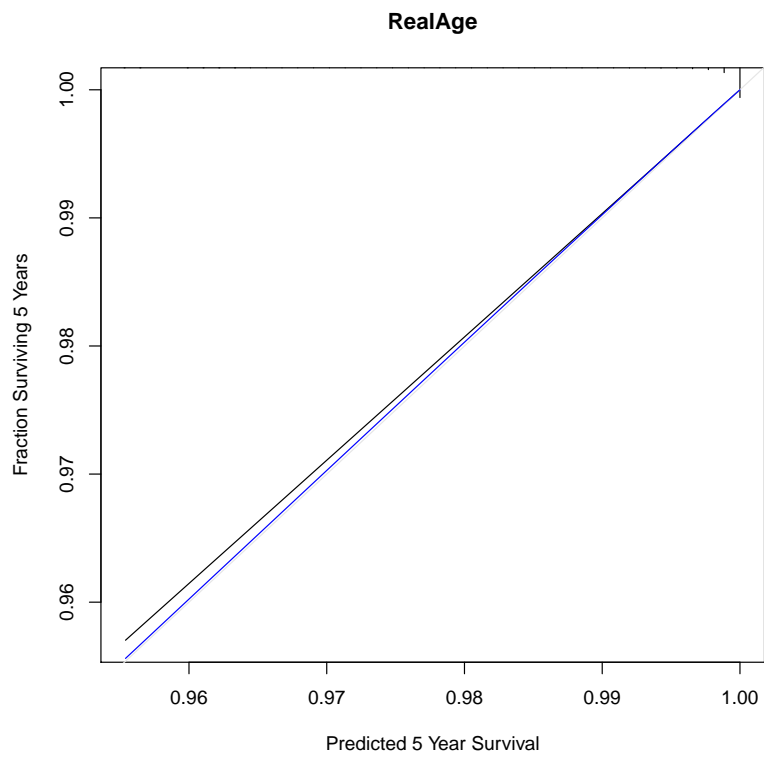

Figure S8: Calibration plot - RealAge.

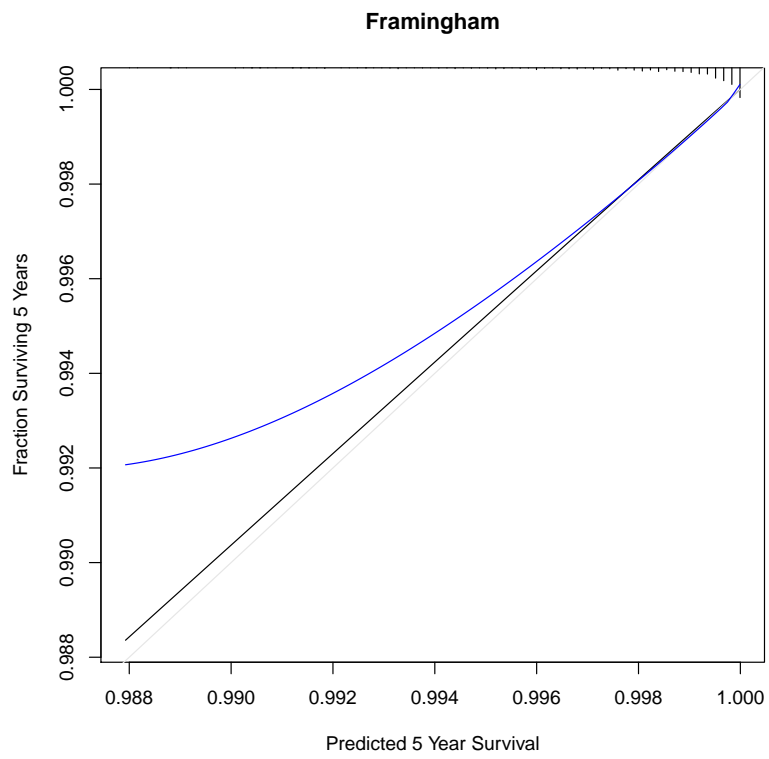

Figure S9: Calibration plot - Framingham.

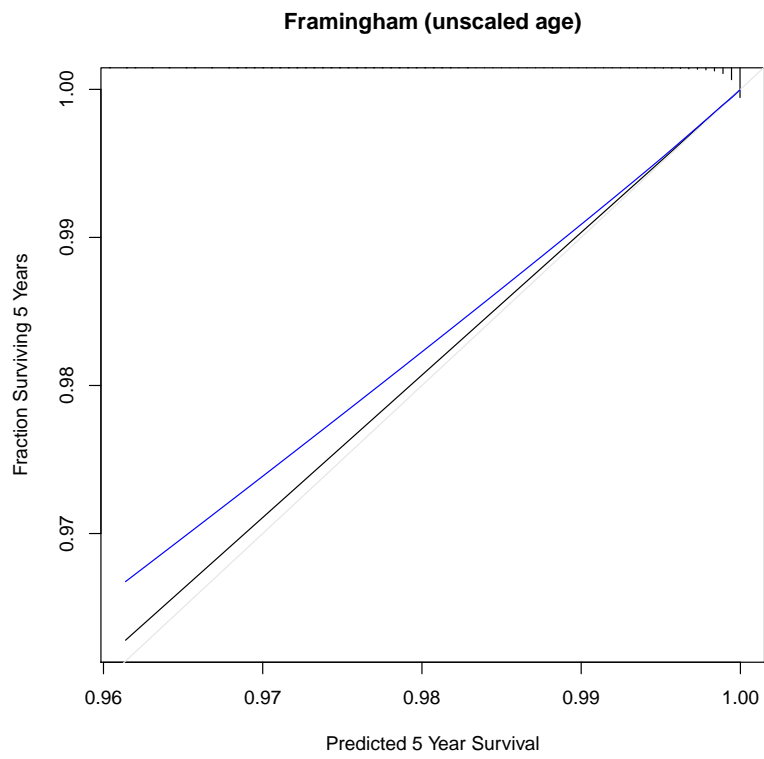

Figure S10: Calibration plot - Framingham (unscaled age)



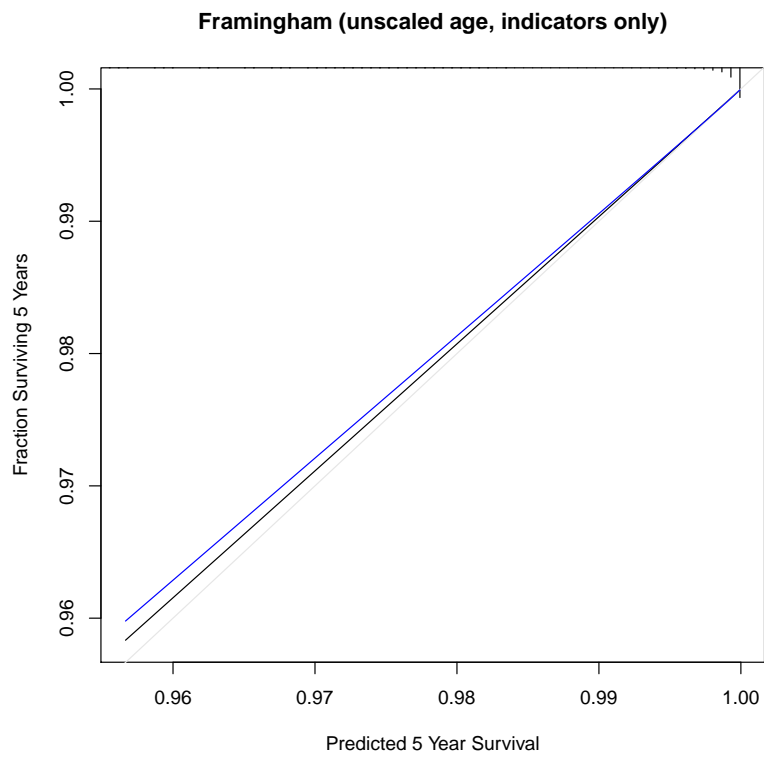

Figure S11: Calibration plot - Framingham (unscaled age, indicators only)

## Estimates by age group

### 25 to 44

| Table S7: 25 to 44 - model results |       |                |       |
|------------------------------------|-------|----------------|-------|
|                                    | HR    | (2.5%, 97.5%)  | p     |
| Age                                | 1.054 | (1.021, 1.087) | 0.001 |
| <hr/>                              |       |                |       |
|                                    | HR    | (2.5%, 97.5%)  | p     |
| RealAge                            | 1.081 | (1.066, 1.095) | 0.000 |
| <hr/>                              |       |                |       |
|                                    | HR    | (2.5%, 97.5%)  | p     |
| Age                                | 1.049 | (1.017, 1.082) | 0.002 |
| RealAgeDelta                       | 1.087 | (1.073, 1.102) | 0.000 |

| Table S8: 25 to 44 - model results (age base) |       |                |       |
|-----------------------------------------------|-------|----------------|-------|
|                                               | HR    | (2.5%, 97.5%)  | p     |
| RealAgeDelta                                  | 1.087 | (1.071, 1.103) | 0.000 |

45 to 64

Table S9: 45 to 64 - model results

|              | HR    | (2.5%, 97.5%)  | p     |
|--------------|-------|----------------|-------|
| Age          | 1.068 | (1.050, 1.085) | 0.000 |
| RealAge      | 1.088 | (1.079, 1.096) | 0.000 |
| Age          | 1.064 | (1.047, 1.082) | 0.000 |
| RealAgeDelta | 1.094 | (1.085, 1.103) | 0.000 |

Table S10: 45 to 64 - model results (age base)

|              | HR    | (2.5%, 97.5%)  | p     |
|--------------|-------|----------------|-------|
| RealAgeDelta | 1.095 | (1.084, 1.105) | 0.000 |

65 to 84

Table S11: 65 to 84 - model results

|     | HR    | (2.5%, 97.5%)  | p     |
|-----|-------|----------------|-------|
| Age | 1.081 | (1.064, 1.100) | 0.000 |

  

|         | HR    | (2.5%, 97.5%)  | p     |
|---------|-------|----------------|-------|
| RealAge | 1.074 | (1.064, 1.083) | 0.000 |

  

|              | HR    | (2.5%, 97.5%)  | p     |
|--------------|-------|----------------|-------|
| Age          | 1.086 | (1.067, 1.104) | 0.000 |
| RealAgeDelta | 1.070 | (1.059, 1.081) | 0.000 |

Table S12: 65 to 84 - model results (age base)

|              | HR    | (2.5%, 97.5%)  | p     |
|--------------|-------|----------------|-------|
| RealAgeDelta | 1.071 | (1.060, 1.082) | 0.000 |

## Heart Disease Estimates

Table S13: All users - Death from Heart Disease

|                      | HR      | (2.5%, 97.5%)  | p     |
|----------------------|---------|----------------|-------|
| Age                  | 1.088   | (1.077, 1.099) | 0.000 |
| RealAge              | 1.096   | (1.087, 1.105) | 0.000 |
| Age                  | 1.088   | (1.077, 1.100) | 0.000 |
| RealAgeDelta         | 1.105   | (1.092, 1.119) | 0.000 |
| # of users in sample | 187,904 |                |       |
| # deceased in sample | 252     |                |       |

Table S14: Death from Heart Disease (age in base hazard)

|              | HR    | (2.5%, 97.5%)  | p     |
|--------------|-------|----------------|-------|
| RealAgeDelta | 1.109 | (1.095, 1.123) | 0.000 |

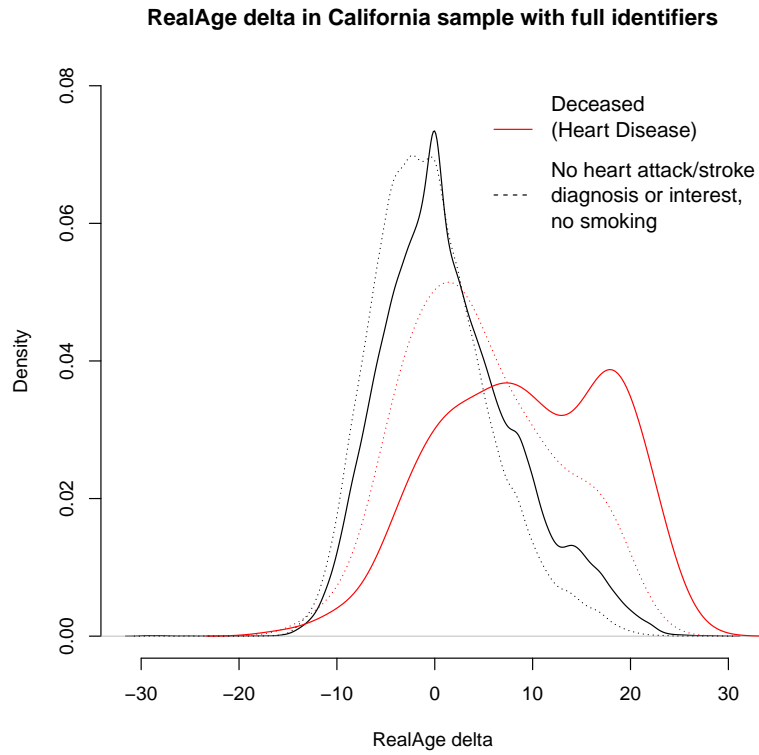

Figure S12: Comparison of RealAge score distributions for all deceased/surviving users and deceased/surviving "healthy" users (heart disease).

## Cancer Estimates

Table S15: All users - Death from Cancer

|                      | HR      | (2.5%, 97.5%)  | p     |
|----------------------|---------|----------------|-------|
| Age                  | 1.094   | (1.084, 1.103) | 0.000 |
| RealAge              | 1.079   | (1.071, 1.085) | 0.000 |
| Age                  | 1.094   | (1.084, 1.103) | 0.000 |
| RealAgeDelta         | 1.054   | (1.042, 1.067) | 0.000 |
| # of users in sample | 187,991 |                |       |
| # deceased in sample | 339     |                |       |

Table S16: Death from Cancer (age in base hazard)

|              | HR    | (2.5%, 97.5%)  | p     |
|--------------|-------|----------------|-------|
| RealAgeDelta | 1.051 | (1.039, 1.064) | 0.000 |

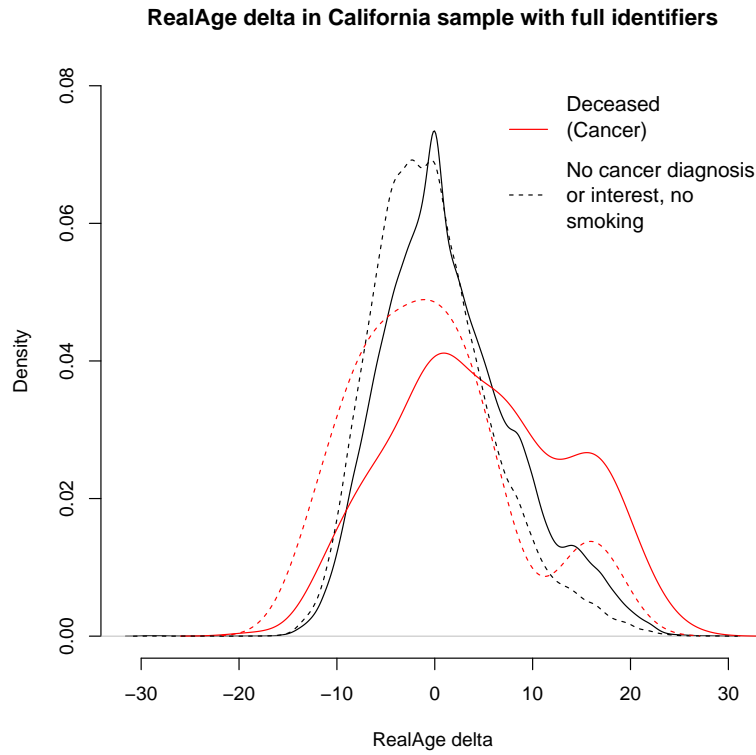

Figure S13: Comparison of RealAge score distributions for all deceased/surviving users and deceased/surviving "healthy" users (cancer).



## External Cause Estimates

| Table S17: All users - Death from External Cause |         |                |       |
|--------------------------------------------------|---------|----------------|-------|
|                                                  | HR      | (2.5%, 97.5%)  | p     |
| Age                                              | 0.996   | (0.980, 1.012) | 0.584 |
| RealAge                                          | 1.024   | (1.010, 1.038) | 0.000 |
| Age                                              | 0.992   | (0.976, 1.008) | 0.348 |
| RealAgeDelta                                     | 1.090   | (1.070, 1.108) | 0.000 |
| # of users in sample                             | 187,741 |                |       |
| # deceased in sample                             | 89      |                |       |

Table S18: Death from External Cause (age in base hazard)

|              | HR    | (2.5%, 97.5%)  | p     |
|--------------|-------|----------------|-------|
| RealAgeDelta | 1.087 | (1.063, 1.111) | 0.000 |

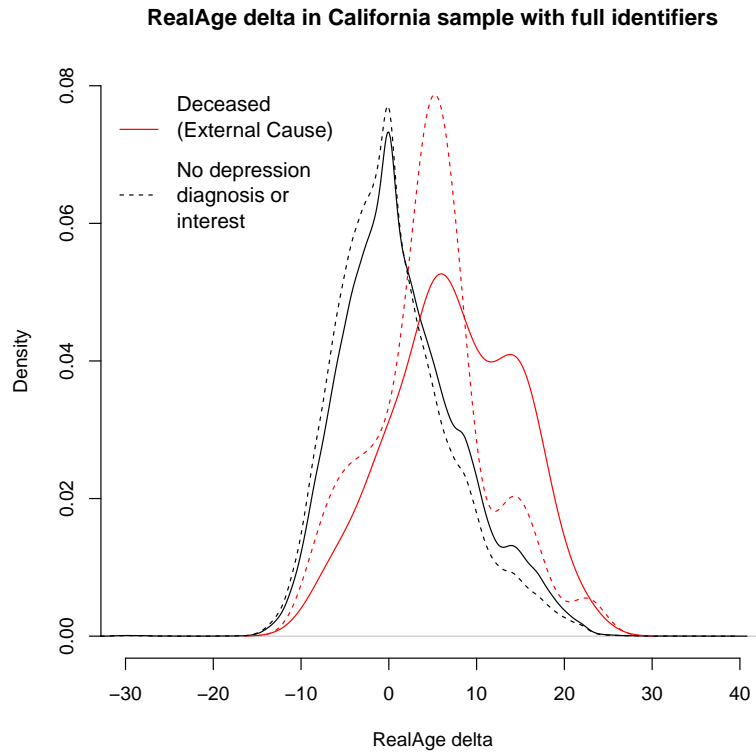

Figure S14: Comparison of RealAge score distributions for all deceased/surviving users and deceased/surviving "healthy" users (external causes).

## Estimates for users with at least two years of follow-up

Table S19: All users - at least two years follow-up

|                      | HR      | (2.5%, 97.5%)  | p     |
|----------------------|---------|----------------|-------|
| Age                  | 1.079   | (1.073, 1.085) | 0.000 |
| RealAge              | 1.080   | (1.075, 1.084) | 0.000 |
| Age                  | 1.078   | (1.071, 1.085) | 0.000 |
| RealAgeDelta         | 1.081   | (1.074, 1.090) | 0.000 |
| # of users in sample | 160,261 |                |       |
| # deceased in sample | 642     |                |       |

## Estimates for "healthy" users

Table S20: All users - Death from Heart Disease, no Report Diagnosis or Interest for Heart Attack or Stroke, no Smoking

|                      | HR     | (2.5%, 97.5%)  | p     |
|----------------------|--------|----------------|-------|
| Age                  | 1.071  | (1.046, 1.097) | 0.000 |
| RealAge              | 1.085  | (1.063, 1.107) | 0.000 |
| Age                  | 1.076  | (1.050, 1.102) | 0.000 |
| RealAgeDelta         | 1.103  | (1.070, 1.137) | 0.000 |
| # of users in sample | 84,190 |                |       |
| # deceased in sample | 40     |                |       |

Table S21: All users - Death from Cancer, no Reported Diagnosis or Interest for Cancer, no Smoking

|                      | HR     | (2.5%, 97.5%)  | p     |
|----------------------|--------|----------------|-------|
| Age                  | 1.108  | (1.083, 1.132) | 0.000 |
| RealAge              | 1.071  | (1.054, 1.088) | 0.000 |
| Age                  | 1.108  | (1.083, 1.132) | 0.000 |
| RealAgeDelta         | 1.004  | (0.968, 1.041) | 0.847 |
| # of users in sample | 71,271 |                |       |
| # deceased in sample | 52     |                |       |

Table S22: All users - Death from External Cause, no Reported Diagnosis or Interest for Depression

|                      | HR      | (2.5%, 97.5%)  | p     |
|----------------------|---------|----------------|-------|
| Age                  | 0.992   | (0.965, 1.020) | 0.594 |
| RealAge              | 1.010   | (0.985, 1.035) | 0.440 |
| Age                  | 0.991   | (0.963, 1.019) | 0.509 |
| RealAgeDelta         | 1.066   | (1.019, 1.115) | 0.005 |
| # of users in sample | 124,919 |                |       |
| # deceased in sample | 27      |                |       |
